# Supplementary material for: Robust Radiomics Feature Quantification Using Semiautomatic Volumetric Segmentation
Source: PubMed Central journal article supplement (PMC4098900; doi:10.1371/journal.pone.0102107), 2014-07-15
Supplement: pone.0102107.s002.pdf [file pone.0102107.s002.pdf]

# Supplements

## **Robust Radiomics Feature Quantification using Semiautomatic Volumetric Segmentation**

Chintan Parmar, Emmanuel Rios Velazquez, Ralph Leijenaar, Mohammed Jermoumi, Sara Carvalho,  
Raymond H. Mak, Sushmita Mitra, B. Uma Shankar, Ron Kikinis, Benjamin Haibe-Kains, Philippe  
Lambin, Hugo J.W.L. Aerts

## Supplement SII: Table

Results for the reproducibility analysis, showing ICC for radiomic features, derived from manual and 3D-Slicer segmentations, as well as feature reproducibility class, defined as high ( $ICC \geq 0.8$ ), medium ( $0.8 > ICC \geq 0.5$ ), or low ( $ICC < 0.5$ ).

| Feature Name                                             | Manual ICC                        | Manual Feature Reproducibility Class | 3D-Slicer ICC (avg of two inter-obs. sets) | 3D Slicer Feature Reproducibility Class |
|----------------------------------------------------------|-----------------------------------|--------------------------------------|--------------------------------------------|-----------------------------------------|
| <b>Intensity statistics based Features (First order)</b> |                                   |                                      |                                            |                                         |
| Energy                                                   | 0.98                              | High                                 | 0.99                                       | High                                    |
| Entropy                                                  | 0.61                              | Medium                               | 0.84                                       | High                                    |
| Kurtosis                                                 | 0.45                              | Low                                  | 0.82                                       | High                                    |
| Maximum                                                  | 0.67                              | Medium                               | 0.53                                       | Medium                                  |
| Mean deviation                                           | 0.49                              | Low                                  | 0.85                                       | High                                    |
| Mean                                                     | 0.51                              | Medium                               | 0.75                                       | Medium                                  |
| Median                                                   | 0.54                              | Medium                               | 0.66                                       | Medium                                  |
| Minimum                                                  | 0.59                              | Medium                               | 0.74                                       | Medium                                  |
| Range                                                    | 0.71                              | Medium                               | 0.76                                       | Medium                                  |
| Root mean square                                         | 0.52                              | Medium                               | 0.72                                       | Medium                                  |
| Skewness                                                 | 0.57                              | Medium                               | 0.90                                       | High                                    |
| Standard deviation                                       | 0.50                              | Medium                               | 0.87                                       | High                                    |
| Total Energy                                             | 0.98                              | High                                 | 0.99                                       | High                                    |
| Uniformity                                               | 0.72                              | Medium                               | 0.90                                       | High                                    |
| Variance                                                 | 0.57                              | Medium                               | 0.93                                       | High                                    |
| <b>Group (mean <math>\pm</math> SD)</b>                  | <b>0.63 <math>\pm</math> 0.16</b> |                                      | <b>0.82 <math>\pm</math> 0.13</b>          |                                         |
| <b>Shape based Features</b>                              |                                   |                                      |                                            |                                         |
| Compactness 1                                            | 0.98                              | High                                 | 0.99                                       | High                                    |
| Compactness 2                                            | 0.52                              | Medium                               | 0.37                                       | Low                                     |
| Maximum diameter                                         | 0.94                              | High                                 | 0.88                                       | High                                    |
| Sph. Disproportion                                       | 0.64                              | Medium                               | 0.35                                       | Low                                     |
| Sphericity                                               | 0.54                              | Medium                               | 0.36                                       | Low                                     |
| Surface area                                             | 0.94                              | High                                 | 0.97                                       | High                                    |
| Surface/volume                                           | 0.97                              | High                                 | 0.97                                       | High                                    |
| Volume                                                   | 0.97                              | High                                 | 0.99                                       | High                                    |
| <b>Group (mean <math>\pm</math> SD)</b>                  | <b>0.80 <math>\pm</math> 0.22</b> |                                      | <b>0.75 <math>\pm</math> 0.31</b>          |                                         |
| <b>Texture Features (GLCM-GLRL)</b>                      |                                   |                                      |                                            |                                         |
| Autocorrelation                                          | 0.83                              | High                                 | 0.79                                       | Medium                                  |
| Cluster prominence                                       | 0.97                              | High                                 | 0.99                                       | High                                    |
| Cluster shade                                            | 0.92                              | High                                 | 0.99                                       | High                                    |
| Cluster tendency                                         | 0.73                              | Medium                               | 0.96                                       | High                                    |
| Contrast                                                 | 0.56                              | Medium                               | 0.77                                       | High                                    |
| Correlation                                              | 0.79                              | Medium                               | 0.77                                       | Medium                                  |
| Difference entropy                                       | 0.67                              | Medium                               | 0.88                                       | High                                    |
| Dissimilarity                                            | 0.64                              | Medium                               | 0.85                                       | High                                    |
| Energy                                                   | 0.76                              | Medium                               | 0.92                                       | High                                    |
| Entropy                                                  | 0.53                              | Medium                               | 0.84                                       | High                                    |
| Homogeneity 1                                            | 0.81                              | High                                 | 0.95                                       | High                                    |
| Homogeneity 2                                            | 0.83                              | High                                 | 0.95                                       | High                                    |
| IMC1                                                     | 0.95                              | High                                 | 0.93                                       | High                                    |
| IMC2                                                     | 0.89                              | High                                 | 0.89                                       | High                                    |

|                          |                    |        |                    |        |
|--------------------------|--------------------|--------|--------------------|--------|
| IDMN                     | 0.75               | Medium | 0.93               | High   |
| IDN                      | 0.84               | High   | 0.95               | High   |
| Inverse variance         | 0.79               | Medium | 0.95               | High   |
| Max. prob.               | 0.86               | High   | 0.96               | High   |
| Sum average              | 0.82               | High   | 0.75               | Medium |
| Sum entropy              | 0.55               | Medium | 0.83               | High   |
| Sum variance             | 0.81               | High   | 0.79               | Medium |
| Variance                 | 0.83               | High   | 0.79               | High   |
| GLN                      | 0.99               | High   | 0.99               | High   |
| HGLRE                    | 0.84               | High   | 0.80               | High   |
| LGLRE                    | 0.93               | High   | 0.97               | High   |
| LRE                      | 0.94               | High   | 0.90               | High   |
| LRHGLE                   | 0.89               | High   | 0.74               | Medium |
| LRLGLE                   | 0.93               | High   | 0.89               | High   |
| RLN                      | 0.94               | High   | 0.98               | High   |
| RP                       | 0.93               | High   | 0.97               | High   |
| SRE                      | 0.90               | High   | 0.96               | High   |
| SRHGLE                   | 0.78               | Medium | 0.73               | Medium |
| SRLGLE                   | 0.91               | High   | 0.81               | High   |
| <b>Group (mean ± SD)</b> | <b>0.82 ± 0.12</b> |        | <b>0.88 ± 0.09</b> |        |
| <b>Total (mean ± SD)</b> | <b>0.77 ± 0.17</b> |        | <b>0.85 ± 0.15</b> |        |

Intensity statistics and textural features were significantly higher (two sided Wilcoxon test  $p = 0.0006$ ,  $p = 0.009$ , respectively) in reproducibility (ICC) for 3D-Slicer segmentations as compared to manual delineations. However, no statistically significant difference in reproducibility could be observed (two sided Wilcoxon test  $p = 0.31$ ) for shape based features between the two segmentation strategies.
